# Supplementary material for: Transfer of radiocaesium from contaminated bottom sediments to marine organisms through benthic food chains in post-Fukushima and post-Chernobyl periods
Source: Copernicus journal article supplement (doi:10.5194/bg-13-3021-2016), 2016-05-23
Supplement: Supplementary file 1 [file bg-13-3021-2016-supplement.pdf]

Supplement of Biogeosciences, 13, 3021–3034, 2016  
<http://www.biogeosciences.net/13/3021/2016/>  
doi:10.5194/bg-13-3021-2016-supplement  
© Author(s) 2016. CC Attribution 3.0 License.

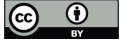

Biogeosciences  Open Access

*Supplement of*

## **Transfer of radiocaesium from contaminated bottom sediments to marine organisms through benthic food chains in post-Fukushima and post-Chernobyl periods**

**Roman Bezhenar et al.**

*Correspondence to:* Vladimir Maderich ([vladmad@gmail.com](mailto:vladmad@gmail.com))

The copyright of individual parts of the supplement might differ from the CC-BY 3.0 licence.

# Supplementary materials to the paper “Transfer of radiocaesium from contaminated bottom sediments to marine organisms through benthic food chain”

## Poseidon-R model

The mechanisms of radionuclide transfer in the POSEIDON-R model (Lepicard et al., 2004) are as follows. Activity entering the water column is transported by currents and turbulent diffusion and lost to bottom sediments through sorption on suspended particles which then settle out. The exchange of activity between the upper layer of the sediment and the water column is described as diffusion and bioturbation (modelled as a diffusion process). Activity in the upper sediment layer may diffuse downward but there is also an effective downward transfer via the continued sedimentation at the top of the sediment layers. Return of activity from the middle sediment to the top sediment occurs only through diffusion. The effective loss of activity from middle sediment to deep sediment arises from the continued deposition of sediment. A more detailed composition of the water column and its sediment layers, as well as its interaction with neighbouring volumes is shown in Fig. S1.

The POSEIDON-R equations are obtained by averaging the three dimensional transport equations for the dissolved radionuclide concentration  $C_w$  ( $\text{Bq}\cdot\text{m}^{-3}$ ) and the concentration in the three layers of the bottom sediment. It is assumed that the activity in the water column is partitioned between the water phase and the suspended sediment material, resulting in the following relation:

$$C_{ss} = K_d C_w. \quad (\text{S1})$$

where  $C_{ss}$  ( $\text{Bq}\cdot\text{kg}^{-1}$ ) is the concentration of radioactivity sorbed by suspended sediment,  $K_d$  is the radionuclide distribution coefficient ( $\text{m}^3\cdot\text{kg}^{-1}$ ). The equations read as follows.

For the water column layers:

$$\frac{\partial C_{w,i}}{\partial t} = \sum_j \left[ \frac{F_{ji}}{V_{w,i}} C_{w,j} - \frac{F_{ij}}{V_{w,j}} C_{w,i} \right] + \gamma_{0i} C_{w,(i,j,k-1)} - (\gamma_{1i} + \lambda) C_{w,i} + \frac{L_{t,i}}{h_i} \gamma_2 C_{s,1} + Q_{si}; \quad (\text{S2})$$

for the upper sediment layer:

$$\frac{\partial C_{s,1}}{\partial t} = -(\gamma_2 + \gamma_3 + \lambda) C_{s,1} + \frac{h_i}{L_{t,i}} \gamma_{1,i} C_{w,i} + \frac{L_{m,i}}{L_{t,i}} \gamma_4 C_{s,2}; \quad (\text{S3})$$

for the middle sediment layer:

$$\frac{\partial C_{s,2}}{\partial t} = -(\gamma_4 + \gamma_5 + \lambda) C_{s,2} + \frac{L_{t,i}}{L_{m,i}} \gamma_3 C_{s,1}. \quad (\text{S4})$$

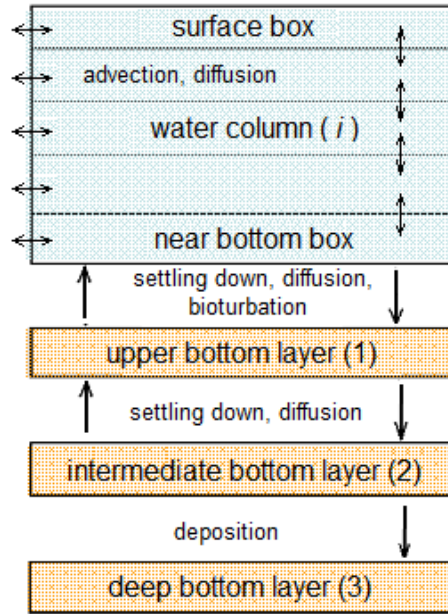

Fig.S1 Vertical structure and radionuclide transfer processes in the compartment of POSEIDON-R model. Arrows show exchange between boxes and layers.

Here subscript (0) denotes the water column, subscripts (1) and (2) denote the upper and middle sediment layer, respectively;  $C_{w,i}$  is the box averaged concentration of radionuclide  $C_w$  in the water column layer  $i$ ;  $C_{s,1}$  is the averaged concentration of radionuclide in the upper sediment layer;  $C_{s,2}$  is the averaged concentration in the middle sediment layer;  $\lambda$  ( $y^{-1}$ ) is the radionuclide decay constant;  $F_{ij}$  is the water flux ( $t \cdot y^{-1}$ ) from box  $i$  to box  $j$ ;  $V_{w,i}$  is the box volume ( $m^3$ );  $h_i$  is the depth of the water box layer (m);  $L_t$ ,  $L_m$  are the depth (m) of top and middle bottom sediment layers respectively;  $Q_{s,i}$  is the point source of the activity in box  $i$  ( $Bq \cdot y^{-1}$ );  $\gamma_0 \dots \gamma_5$  are the coefficients, their values depend on the characteristics of the radionuclide and sediments.

For the surface water layer, the coefficients are as follows:

$$\begin{aligned} \gamma_{0i} &= 0, \\ \gamma_{1i} &= \frac{K_d SSW}{h_i (1 + K_d SS)}, \\ \gamma_2 &= 0. \end{aligned} \quad (S5)$$

and for the layers in the water column below the surface water layer, the coefficients are defined as follows:

$$\begin{aligned} \gamma_{oi} &= \frac{K_d SSW}{h_i (1 + K_d SS)}, \\ \gamma_{1i} &= \frac{K_d SS}{h_i (1 + K_d SS)}, \\ \gamma_2 &= 0. \end{aligned} \quad (S6)$$

In the near bottom layer located at the bottom of the water column just above the bottom sediment, the coefficients are defined as:

$$\begin{aligned}
\gamma_{oi} &= \frac{K_d SSW}{h_i(1+K_d SS)}, \\
\gamma_{li} &= \frac{K_d SSW}{h_i(1+K_d SS)} + \frac{1}{(1+K_d SS)} \frac{1}{L_b \min(L_b, L_t)} + \frac{K_d SSW}{(1+K_d SS)} \frac{B}{L_b \min(L_b, L_t)}, \\
\gamma_2 &= \frac{1}{R} \frac{D}{L_t \min(L_b, L_t)} + \frac{(R-1)}{R} \frac{B}{L_t \min(L_b, L_t)}, \\
\gamma_3 &= \frac{R-1}{R} \frac{SSW}{L_t(1-\varepsilon)\rho} + \frac{1}{R} \frac{D}{L_t \min(L_t, L_m)}, \\
\text{(S7)} \\
\gamma_4 &= \frac{1}{R} \frac{D}{L_m \min(L_t, L_m)}, \\
\gamma_5 &= \frac{(R-1)}{R} \frac{SSW}{L_m(1-\varepsilon)\rho},
\end{aligned}$$

where the coefficient  $R$  is defined as:

$$R = 1 + \frac{\rho(1-\varepsilon)}{\varepsilon} K_d \quad \text{(S8)}$$

Here  $L_b$  (m) is the length scale of the bottom boundary layer,  $SS$  is the different for each box concentration of suspended sediments ( $\text{t}\cdot\text{m}^{-3}$ ), obtained from observations or model simulation,  $W_g$  is the settling velocity calculated as a function of suspended particles size;  $SSW=SS\cdot W_g$  is the fixed sediment flux ( $\text{t}\cdot\text{m}^{-2}\cdot\text{yr}^1$ );  $D$  is the coefficient of vertical diffusion in the bottom;  $B$  is the coefficient of bioturbation in the top bottom;  $\varepsilon$  is the porosity of the bottom sediment;  $\rho$  is the sediment density.

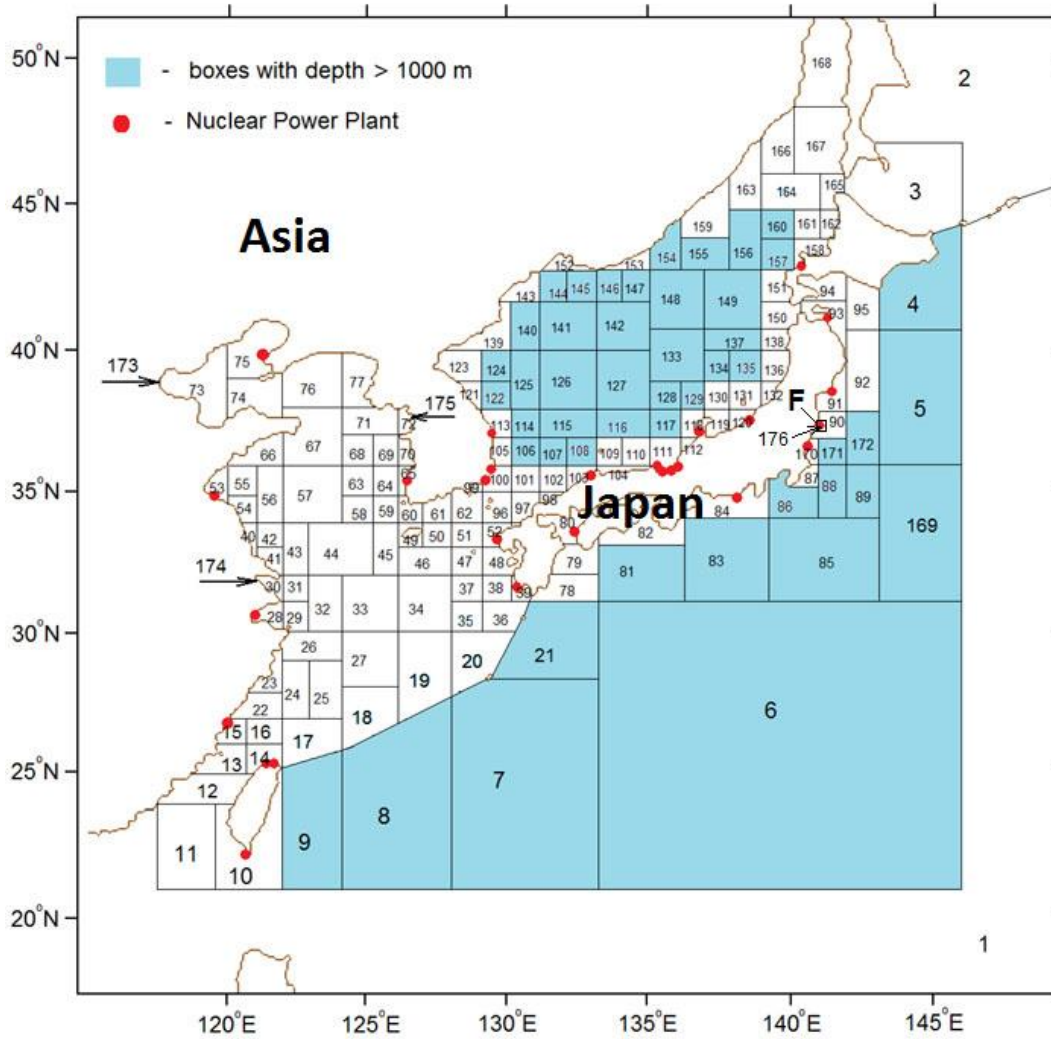

Fig. S2. The compartment system for the Northwestern Pacific. The shaded boxes represent the deep water boxes. The arrows with numbers show the compartments representing estuaries of large rivers (174 – the Yangtze River, 173 – the Huanghe River and 175 – the Han River). The NPPs are shown by filled circles. Letter “F” represent the Fukushima Dai-ichi NPP.

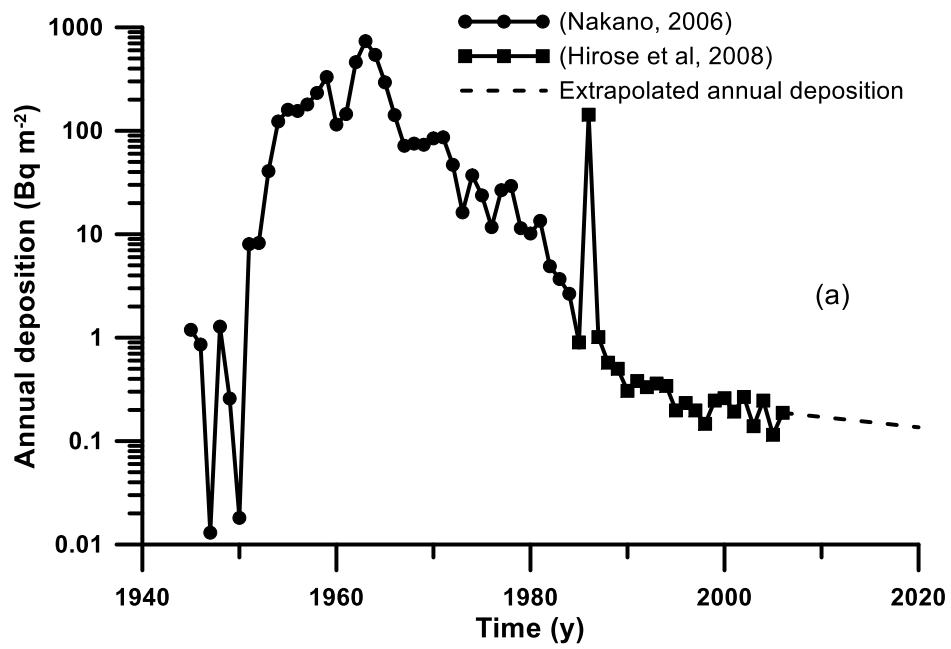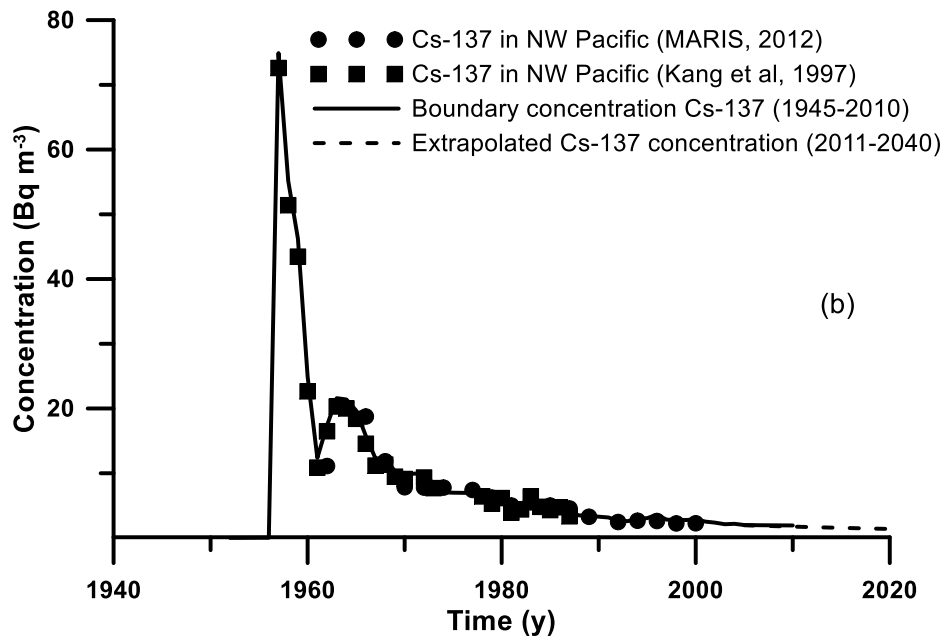

Fig. S3. Time variations of the annual deposition on the surface compiled from Nakano (2006) and Hirose et al (2008) (a) and the boundary values for the  $^{137}\text{Cs}$  concentration in the NW Pacific compiled from MARIS (2012) database and Kang et al. (1997) (b).

Table S1 The model parameters for coastal box around the FDNPP and box 45 in the Baltic Sea.

| Parameter                                                                            | Coastal box<br>(Fukushima case) | Box 45<br>(Baltic Sea case) |
|--------------------------------------------------------------------------------------|---------------------------------|-----------------------------|
| Volume, km <sup>3</sup>                                                              | 22.5                            | 776.3                       |
| Average depth, m                                                                     | 50                              | 31.4                        |
| Water exchange rate with adjacent compartments, km <sup>3</sup> yr <sup>-1</sup>     | 150                             | 4430                        |
| Thickness of top sediment layer, m                                                   | 0.1                             | 0.05                        |
| Concentration of suspended sediments, kg/m <sup>3</sup>                              | 8·10 <sup>-2</sup>              | 1·10 <sup>-3</sup>          |
| Sedimentation rate, kg(m <sup>2</sup> yr) <sup>-1</sup>                              | 1·10 <sup>-2</sup>              | 7.5·10 <sup>-2</sup>        |
| Salinity, PSU                                                                        | 35                              | 15                          |
| Sediment density, kg m <sup>-3</sup>                                                 | 2600                            | 2600                        |
| Vertical diffusion coefficient in bottom sediments, m <sup>2</sup> yr <sup>-1</sup>  | 3.15·10 <sup>-2</sup>           | 3.15·10 <sup>-2</sup>       |
| Bioturbation coefficient, m <sup>2</sup> yr <sup>-1</sup>                            | 3.6·10 <sup>-5</sup>            | 3.6·10 <sup>-5</sup>        |
| Porosity of bottom sediments                                                         | 0.75                            | 0.75                        |
| <sup>137</sup> Cs distribution coefficient, $K_d$ , m <sup>3</sup> ·kg <sup>-1</sup> | 2                               | 2                           |

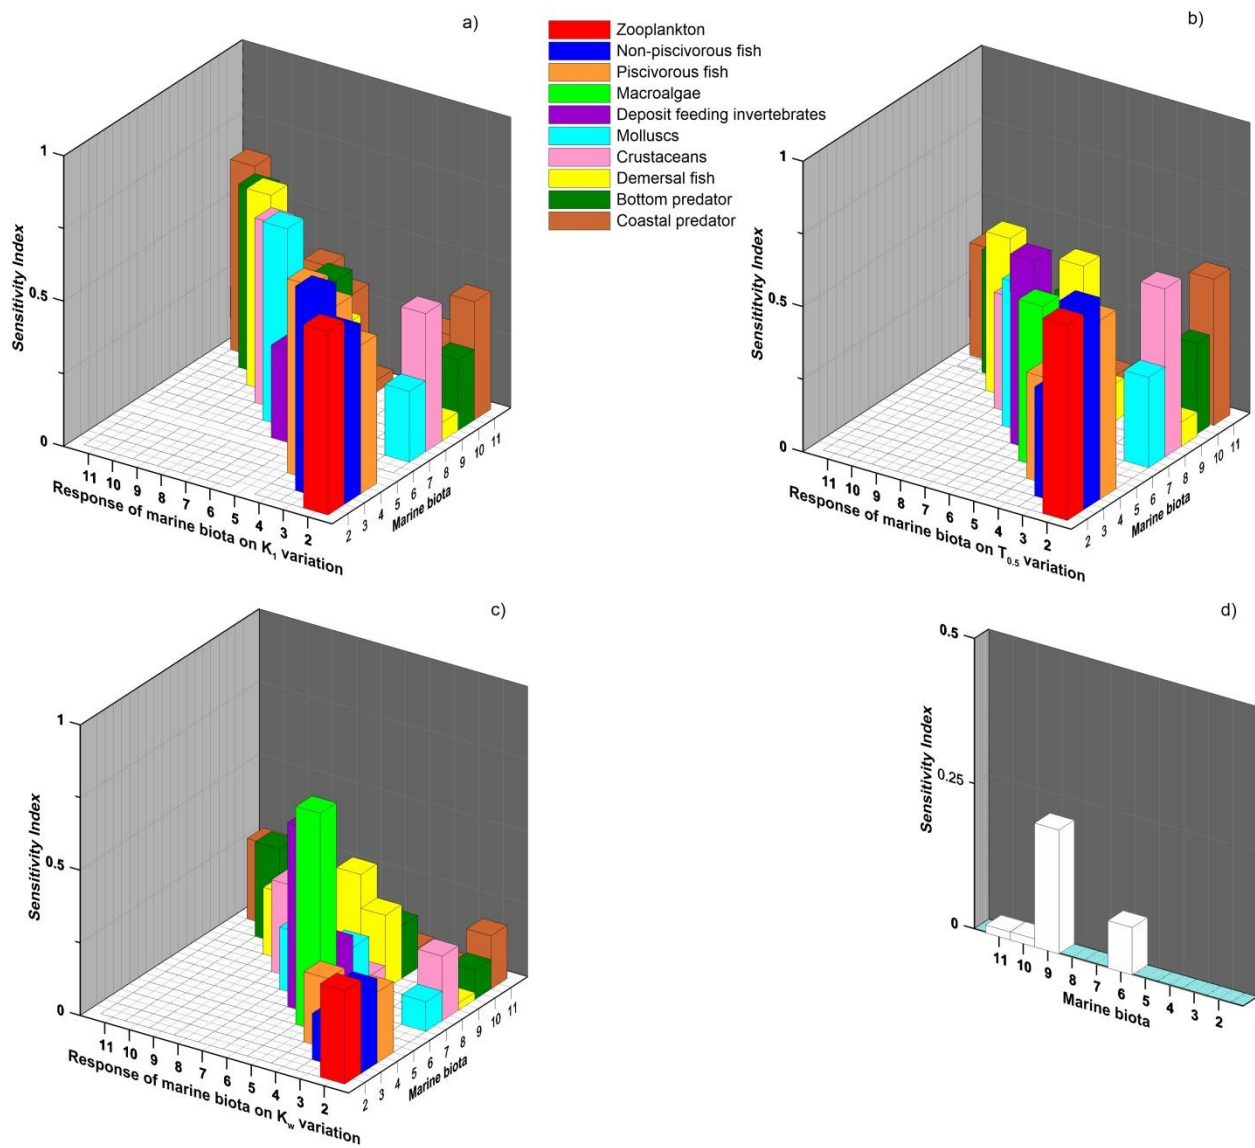

Fig. S4. Sensitivity indexes calculated for food uptake rate  $K_1$  (a), biological half-life  $T_{0.5}$  of  $^{137}\text{Cs}$  in the organism (b), water uptake rate  $K_w$  (c) and for ratio of concentration of assimilated radioactivity from organic fraction of bottom sediment to the concentration of radioactivity of bulk bottom sediment  $\phi_{org}$  (d).



Table S2 The river runoff into the Baltic Sea (Lepparanta and Myrberg, 2009).

| River box → Baltic Sea box | Rivers                                                                              | Inflow<br>(km <sup>3</sup> ·yr <sup>-1</sup> ) |
|----------------------------|-------------------------------------------------------------------------------------|------------------------------------------------|
| 82 → 36                    | Gota-alv + small rivers                                                             | 23                                             |
| 83 → 39                    | All Danish rivers                                                                   | 5                                              |
| 84 → 43                    | Small German rivers                                                                 | 9                                              |
| 85 → 45                    | Oder + small rivers                                                                 | 25                                             |
| 86 → 47                    | Wisla + small rivers                                                                | 50                                             |
| 87 → 48                    | Neman + small rivers                                                                | 30                                             |
| 88 → 59                    | Motala strem + Swedish small rivers                                                 | 9                                              |
| 89 → 58                    | Daugava + small rivers                                                              | 31                                             |
| 90 → 65                    | Narva + small rivers                                                                | 20                                             |
| 91 → 66                    | Kymijoki + small rivers                                                             | 13                                             |
| 92 → 67                    | Neva                                                                                | 79                                             |
| 93 → 71                    | Dalalven + small rivers                                                             | 18                                             |
| 94 → 77                    | Kokemenjoki + other Finnish small rivers                                            | 25                                             |
| 95 → 78                    | Angerman-alv + Indals-alv + smaller rivers                                          | 47                                             |
| 96 → 80                    | Ume-alv + smaller rivers                                                            | 22                                             |
| 97 → 81                    | Kemijoki + Oulujoki + Lijoki + Torne-alv<br>+ Kalix-alv + Lule-alv + smaller rivers | 78                                             |

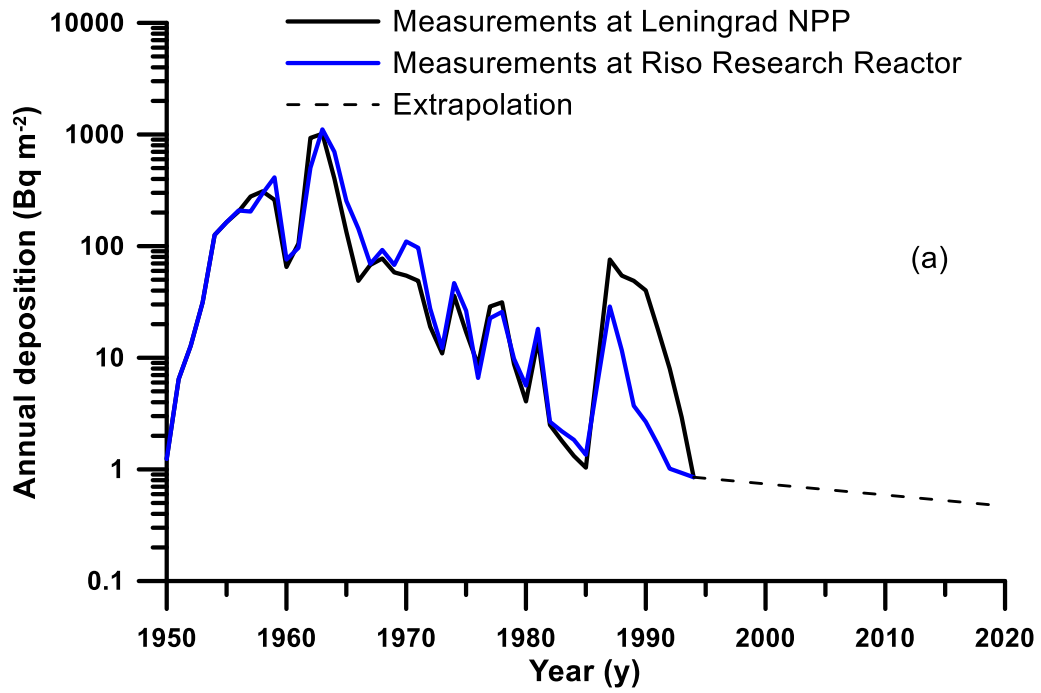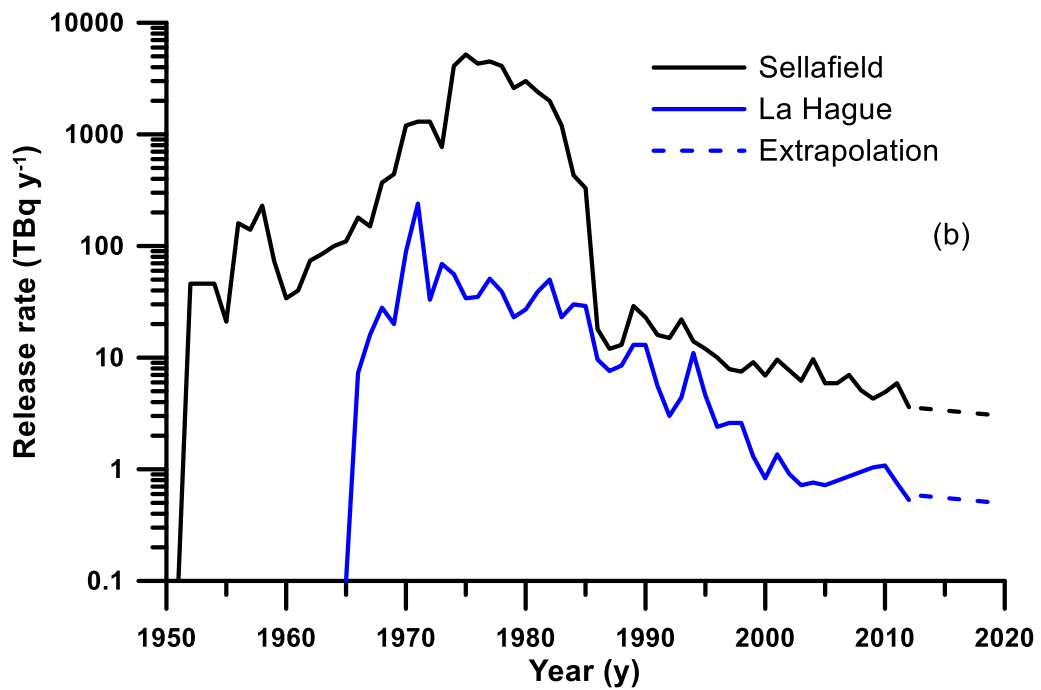

Fig. S5. Global atmosphere deposition rate of  $^{137}\text{Cs}$  on the Baltic Sea (HELCOM, 1995) (a) and release of  $^{137}\text{Cs}$  from Sellafield and La Hague reprocessing plants (HELCOM, 2009).

Table S3. Atmosphere deposition density of  $^{137}\text{Cs}$  in 1986 due to the Chernobyl accident (HELCOM, 1995)

| Basin           | Deposition density, Bq<br>$\text{m}^{-2}$ | Inventory, PBq | Boxes        |
|-----------------|-------------------------------------------|----------------|--------------|
| North-Atlantic  | 1000                                      | 35.4           | 3-34         |
| Kattegat        | 1700                                      | 0.04           | 35-40        |
| Belt Sea        | 1800                                      | 0.05           | 41-43        |
| Baltic Proper   | 4500                                      | 0.82           | 44-57, 59-61 |
| Gulf of Riga    | 5000                                      | 0.08           | 58           |
| Gulf of Finland | 15000                                     | 0.83           | 62-67        |
| Aland Sea       | 72500                                     | 0.55           | 68-69, 71-72 |
| Archipelago Sea | 17300                                     | 0.04           | 70           |
| Bothnian Sea    | 35000                                     | 1.94           | 73-79        |
| Bothnian Bay    | 6900                                      | 0.31           | 80-81        |
